# Supplementary material for: Snacking Behaviours of Australian Young Adults: Secondary Analysis of the MYMeals Cross-Sectional Study
Source: MDPI journal article supplement (doi:10.3390/nu15204471), 2023-10-22
Supplement: s1 [file s1]

**Supplementary Table S1.** Snack consumer demographic characteristics for consumers of snacks for the total sample and for those classified as acceptable energy reporters.

| Participant characteristics          |                             | Total sample<br>n = 889 (%) | Acceptable<br>energy<br>reporter <sup>b</sup><br>n = 589 (%) |
|--------------------------------------|-----------------------------|-----------------------------|--------------------------------------------------------------|
| Total sample                         |                             | 889                         | 589                                                          |
| Gender                               | Female                      | 520 (58)                    | 354 (60)                                                     |
|                                      | Male                        | 369 (42)                    | 235 (40)                                                     |
| Age group (years)                    | 18-24                       | 479 (54)                    | 328 (56)                                                     |
|                                      | 25-30                       | 410 (46)                    | 261 (44)                                                     |
| Body Mass Index (kg/m <sup>2</sup> ) | Underweight (<18.5)         | 47 (5)                      | 41 (7)                                                       |
|                                      | Healthy weight (18.5-24.99) | 501 (56)                    | 372 (63)                                                     |
|                                      | Overweight (25-29.99)       | 224 (25)                    | 129 (22)                                                     |
|                                      | Obese (>29.99)              | 117 (13)                    | 47 (8)                                                       |
| Socioeconomic status <sup>a</sup>    | Low                         | 363 (41)                    | 229 (39)                                                     |
|                                      | High                        | 526 (59)                    | 360 (61)                                                     |

<sup>a</sup>From Socio-Economic Indexes for Areas Index for Relative Advantage and Disadvantage [18] based on residential postcode, lowest five deciles = low, highest five deciles = high. <sup>b</sup>Cut-off for Energy Intake: Basal Metabolic Rate (BMR) for an individual based on three days, low energy reporters < 1.0 x BMR, high energy reporters > 2.4 x BMR were excluded [22].

**Supplementary Table S2.** Median (IQR) contribution (%) of energy, protein, total sugars, sodium, and saturated fat from snacking to total energy and nutrient intake in participants (n=589) who consumed at least one snack during three days recording period and were acceptable energy reporters.

|                                               | Sample size, n | Energy      |      | Protein     |     | Total sugars |      | Sodium      |      | Saturated fat |      |
|-----------------------------------------------|----------------|-------------|------|-------------|-----|--------------|------|-------------|------|---------------|------|
|                                               |                | Media n (%) | IQR  | Media n (%) | IQR | Media n (%)  | IQR  | Media n (%) | IQR  | Media n (%)   | IQR  |
| <b>Acceptable energy reporters, consumers</b> | 589            | 13.9        | 13.7 | 6.8         | 8.8 | 24.3         | 24.5 | 8.6         | 12.3 | 18.1          | 21.1 |
| <b>Age (years)</b>                            |                |             |      |             |     |              |      |             |      |               |      |
| 18-24                                         | 328            | 13.9        | 13.3 | 6.5         | 8.4 | 23.9         | 24.6 | 8.2         | 11.2 | 18.5          | 20.5 |
| 25-30                                         | 261            | 14.1        | 15.1 | 7.3         | 9.5 | 24.9         | 24.8 | 9.0         | 13.2 | 18.1          | 21.9 |
| <b>p-value</b>                                |                | 0.367       |      | 0.206       |     | 0.79         |      | 0.251       |      | 0.649         |      |
| <b>Gender</b>                                 |                |             |      |             |     |              |      |             |      |               |      |
| Male                                          | 235            | 12.9        | 13.2 | 6.4         | 9.3 | 20.7         | 20.9 | 8.0         | 13.3 | 16.5          | 17.8 |
| Female                                        | 354            | 14.8        | 14.1 | 7.2         | 8.4 | 26.9         | 26.1 | 8.9         | 11.8 | 19.6          | 23.8 |
| <b>p-value</b>                                |                | 0.005       |      | 0.06        |     | 0.002        |      | 0.145       |      | 0.016         |      |
| <b>SES</b>                                    |                |             |      |             |     |              |      |             |      |               |      |
| Low                                           | 229            | 14.3        | 14.7 | 7.3         | 9.0 | 23.9         | 24.1 | 9.3         | 12.7 | 18.4          | 21.9 |
| High                                          | 360            | 13.7        | 13.5 | 6.8         | 8.8 | 24.7         | 24.3 | 8.1         | 11.6 | 17.8          | 20.2 |
| <b>p-value</b>                                |                | 0.74        |      | 0.72        |     | 0.322        |      | 0.256       |      | 0.858         |      |
| <b>BMI</b>                                    |                |             |      |             |     |              |      |             |      |               |      |
| Underweight (<18.5)                           | 41             | 12.9        | 12.4 | 5.7         | 8.0 | 25.9         | 22.6 | 8.5         | 12.3 | 15.0          | 18.5 |
| Healthy Weight (18.5-24.99)                   | 372            | 14.3        | 14.1 | 6.8         | 9.2 | 24.2         | 25.1 | 8.1         | 12.1 | 18.1          | 22.4 |
| Overweight (25-29.99)                         | 129            | 13.2        | 15.2 | 7.6         | 8.9 | 24.1         | 23.9 | 9.3         | 13.1 | 18.4          | 19.3 |
| Obese (>29.99)                                | 47             | 15.0        | 14.1 | 6.9         | 8.5 | 24.3         | 27.4 | 9.3         | 13.1 | 18.9          | 22.5 |
| <b>p-value</b>                                |                | 0.841       |      | 0.820       |     | 0.982        |      | 0.812       |      | 0.555         |      |

**Supplementary Table S3.** Median (IQR) of average total energy, protein, total sugars, sodium, and saturated fat intake across three days from snacking in participants (n=589) who consumed at least one snack during the three-day recording period and were acceptable reporters.

| <b>Characteristics</b>                                | <b>Sample size, n</b> | <b>Total energy (kJ)</b><br>Media<br>n | <b>IQR</b> | <b>Total protein (g)</b><br>Media<br>n | <b>IQR</b> | <b>Total sugars (g)</b><br>Media<br>n | <b>IQR</b> | <b>Total sodium (mg)</b><br>Media<br>n | <b>IQR</b> | <b>Total saturated fat (g)</b><br>Media<br>n | <b>IQR</b> |
|-------------------------------------------------------|-----------------------|----------------------------------------|------------|----------------------------------------|------------|---------------------------------------|------------|----------------------------------------|------------|----------------------------------------------|------------|
| <b>Acceptable energy reporters, consumers (total)</b> | 589                   | 1214                                   | 1218       | 6.1                                    | 8.3        | 18.9                                  | 21.8       | 222.0                                  | 323.3      | 5.3                                          | 7.0        |
| <b>Age (years)</b>                                    |                       |                                        |            |                                        |            |                                       |            |                                        |            |                                              |            |
| 18-24                                                 | 328                   | 1171                                   | 1213       | 5.8                                    | 7.7        | 19.0                                  | 20.1       | 205.5                                  | 304.0      | 5.2                                          | 7.0        |
| 25-30                                                 | 261                   | 1301                                   | 1317       | 6.8                                    | 8.9        | 18.9                                  | 23.9       | 236.4                                  | 333.2      | 5.4                                          | 7.9        |
| <b>Gender</b>                                         |                       |                                        |            |                                        |            |                                       |            |                                        |            |                                              |            |
| Male                                                  | 235                   | 1279                                   | 1479       | 7.0                                    | 10.6       | 19.0                                  | 21.8       | 243.9                                  | 433.0      | 5.7                                          | 6.8        |
| Female                                                | 354                   | 1177                                   | 1171       | 5.8                                    | 7.1        | 18.6                                  | 21.9       | 210.3                                  | 279.1      | 5.0                                          | 7.1        |
| <b>SES</b>                                            |                       |                                        |            |                                        |            |                                       |            |                                        |            |                                              |            |
| Low                                                   | 229                   | 1298                                   | 1185       | 6.5                                    | 7.9        | 20.2                                  | 21.4       | 251.6                                  | 325.3      | 5.3                                          | 7.2        |
| High                                                  | 360                   | 1195                                   | 1235       | 5.8                                    | 8.6        | 18.1                                  | 22.0       | 209.2                                  | 310.7      | 5.3                                          | 6.9        |
| <b>BMI</b>                                            |                       |                                        |            |                                        |            |                                       |            |                                        |            |                                              |            |
| Underweight                                           | 41                    | 1043                                   | 967        | 4.7                                    | 6.3        | 15.4                                  | 21.5       | 177.8                                  | 222.7      | 4.4                                          | 4.4        |
| Healthy weight                                        | 372                   | 1177                                   | 1210       | 6.0                                    | 8.2        | 18.3                                  | 21.1       | 210.3                                  | 296.0      | 5.0                                          | 6.6        |
| Overweight                                            | 129                   | 1344                                   | 1337       | 6.9                                    | 9.1        | 18.9                                  | 21.3       | 263.3                                  | 403.7      | 6.2                                          | 8.0        |
| Obese                                                 | 47                    | 1557                                   | 1885       | 7.1                                    | 8.7        | 23.1                                  | 33.4       | 272.0                                  | 380.       | 7.7                                          | 10.0       |
